# Supplementary material for: Cytokinins initiate secondary growth in the Arabidopsis root through a set of LBD genes
Source: PubMed Central journal article supplement — Curr Biol. 2021 Aug 9;31(15):3365–3373.e7. doi: 10.1016/j.cub.2021.05.036 (PMC8360765; doi:10.1016/j.cub.2021.05.036), 2021-08-09
Supplement: mmc1.pdf [file mmc1.pdf]

**Current Biology, Volume 31**

**Supplemental Information**

**Cytokinins initiate secondary  
growth in the *Arabidopsis* root  
through a set of LBD genes**

**Lingling Ye, Xin Wang, Munan Lyu, Riccardo Siligato, Gagan Eswaran, Leo Vainio, Tiina Blomster, Jing Zhang, and Ari Pekka Mähönen**

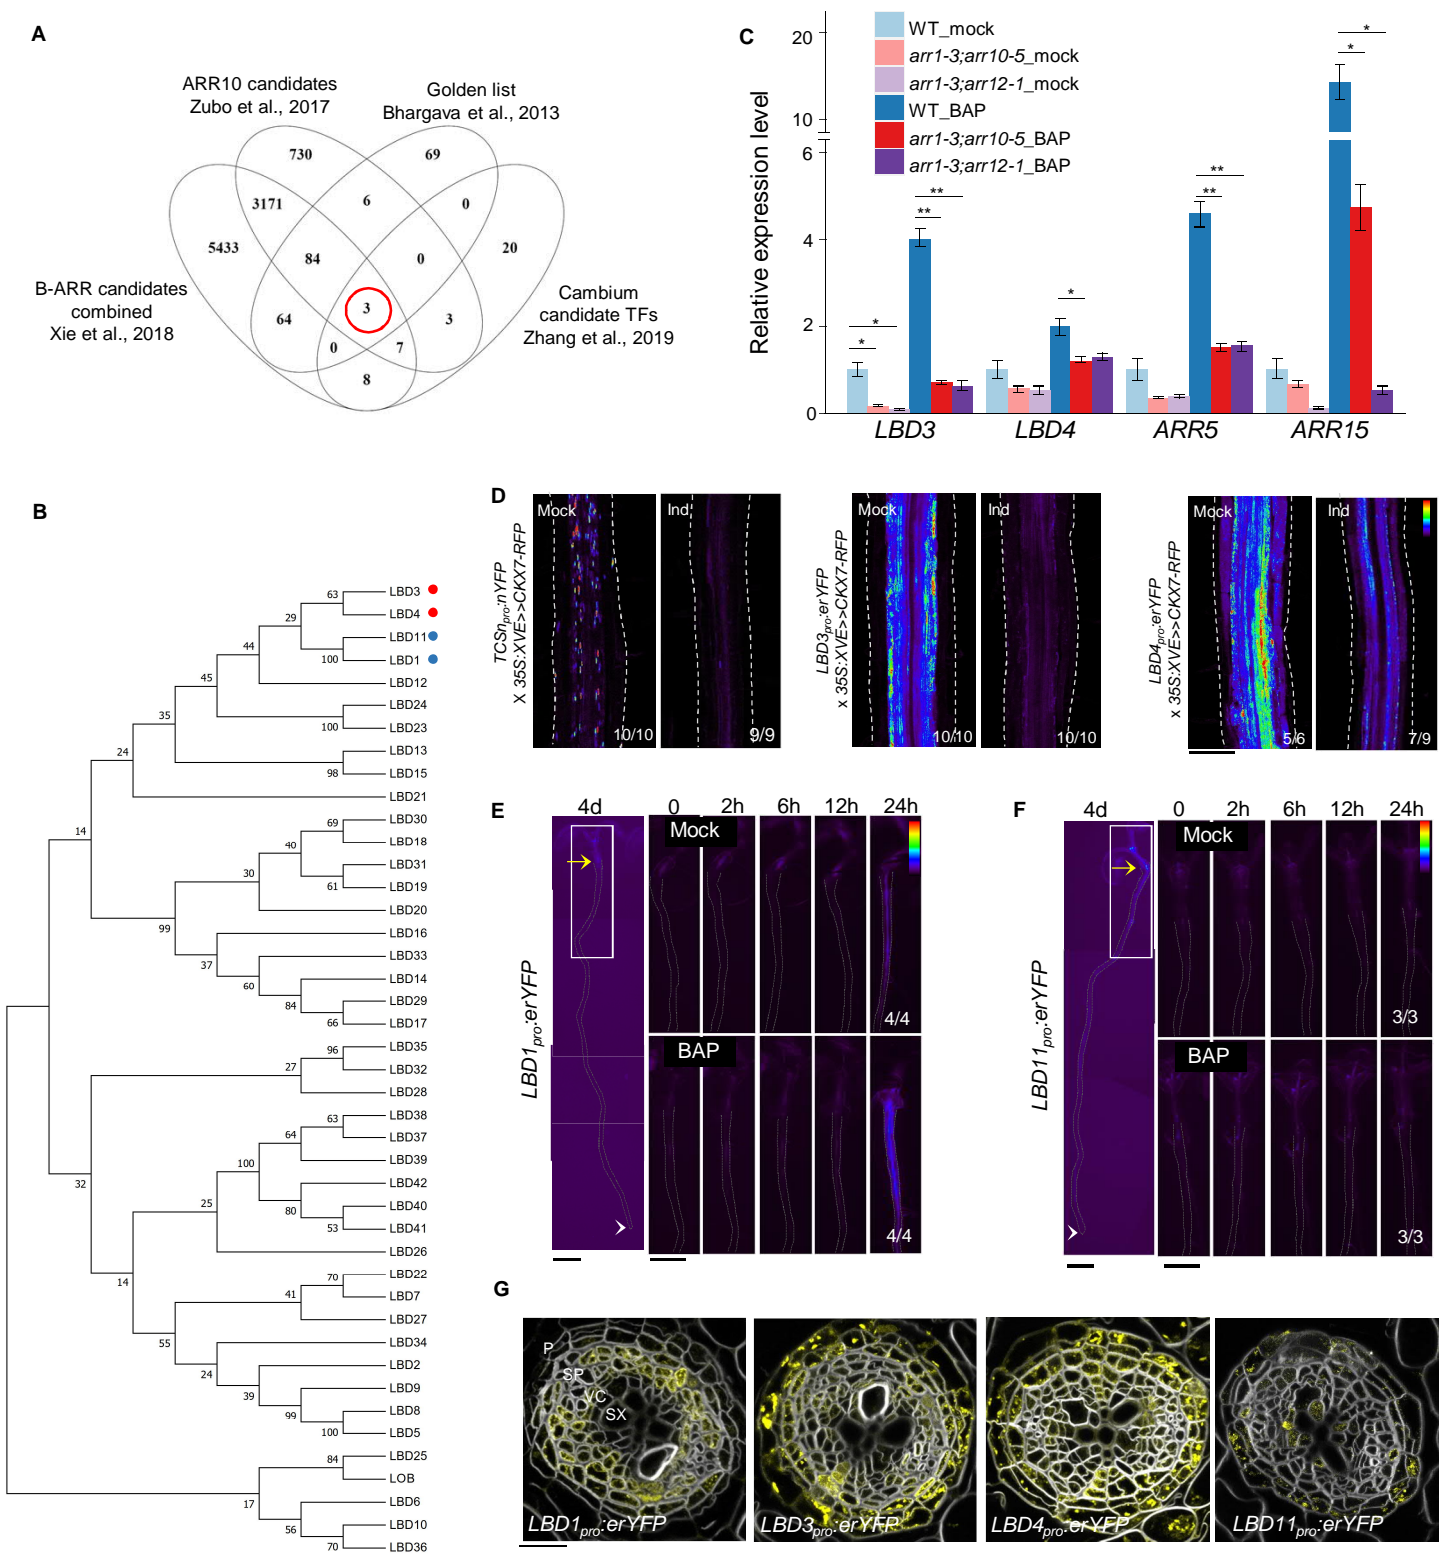

**Figure S1 Identification of cambium transcription factors that are targets of type-B ARRs. Related to Figure 1 and Figure 4.**

(A) Venn diagram comparing ARR10 Chromatin Immunoprecipitation-sequencing (ChIP-seq) candidates<sup>S1</sup>, targets of ARR1, ARR10 or ARR12 ChIP-seq<sup>S2</sup>, the golden list of cytokinin-regulated genes<sup>S3</sup> and cambium candidate transcription factors<sup>S4</sup>. Three genes overlapping in the four datasets are *SHORT HYPOCOTYL 2*, *LBD3* and *LBD4*. (B) Phylogeny of the LBD transcription factor gene family in *Arabidopsis thaliana*. Full-length protein sequences were aligned with Clustal X 2.1<sup>S5</sup>. A maximum-likelihood (ML) tree was generated using MEGA7<sup>S6</sup>. The JTT model was used as amino acid substitution model. Nearest neighbor interchange (NNI) was used as the ML heuristic method. Numbers next to nodes indicates the bootstrap value (1000 replicates). (C) qRT-PCR analysis of gene transcript levels in WT and mutants after 12 h mock or BAP treatment. Five-day-old roots (root tips discarded) were used for qRT-PCR. Data are presented as mean  $\pm$  SE from three biological replicates. For each gene, expression over all mutants and treatments was normalized to WT\_mock. Two-tailed t-test. \*,  $p < 0.05$ ; \*\*,  $p < 0.01$ . (D) Induction of *CKX7* led to downregulation of *TCSn*, *LBD3* and *LBD4*. Confocal microscopy of fluorescent markers after 2-day *CKX7* induction in 6-day-old plants. Dashed lines represent root boundaries. (E,F) Stereo microscopy of *LBD1*(E) and *LBD11*(F) fluorescent markers in 4-day-old roots (left panel) and following a time-course of BAP treatment in 6-day-old roots (right panels). Numbers represent the frequency of the observed expression in independent roots. Yellow arrows indicate the root-hypocotyl junction. White arrowheads mark root tips. White boxes approximately represent the corresponding region visualized in the right-hand panels. (G) Confocal microscopy of LBD markers in root cross-sections. *LBD1<sub>pro</sub>:erYFP* and *LBD11<sub>pro</sub>:erYFP* are expressed in the secondary tissue but more weakly comparing to *LBD3<sub>pro</sub>:erYFP* and *LBD4<sub>pro</sub>:erYFP*. To better visualize the fluorescence signal of *LBD11<sub>pro</sub>:erYFP*, laser power was adjusted to be stronger. Sections were collected from 5 mm below the root-hypocotyl junction of 9-day-old roots. P, periderm; SP, secondary phloem; VC, vascular cambium; SX, secondary xylem. Scale bars, 100  $\mu$ m (D), 1 mm (E,F), 20  $\mu$ m (G).

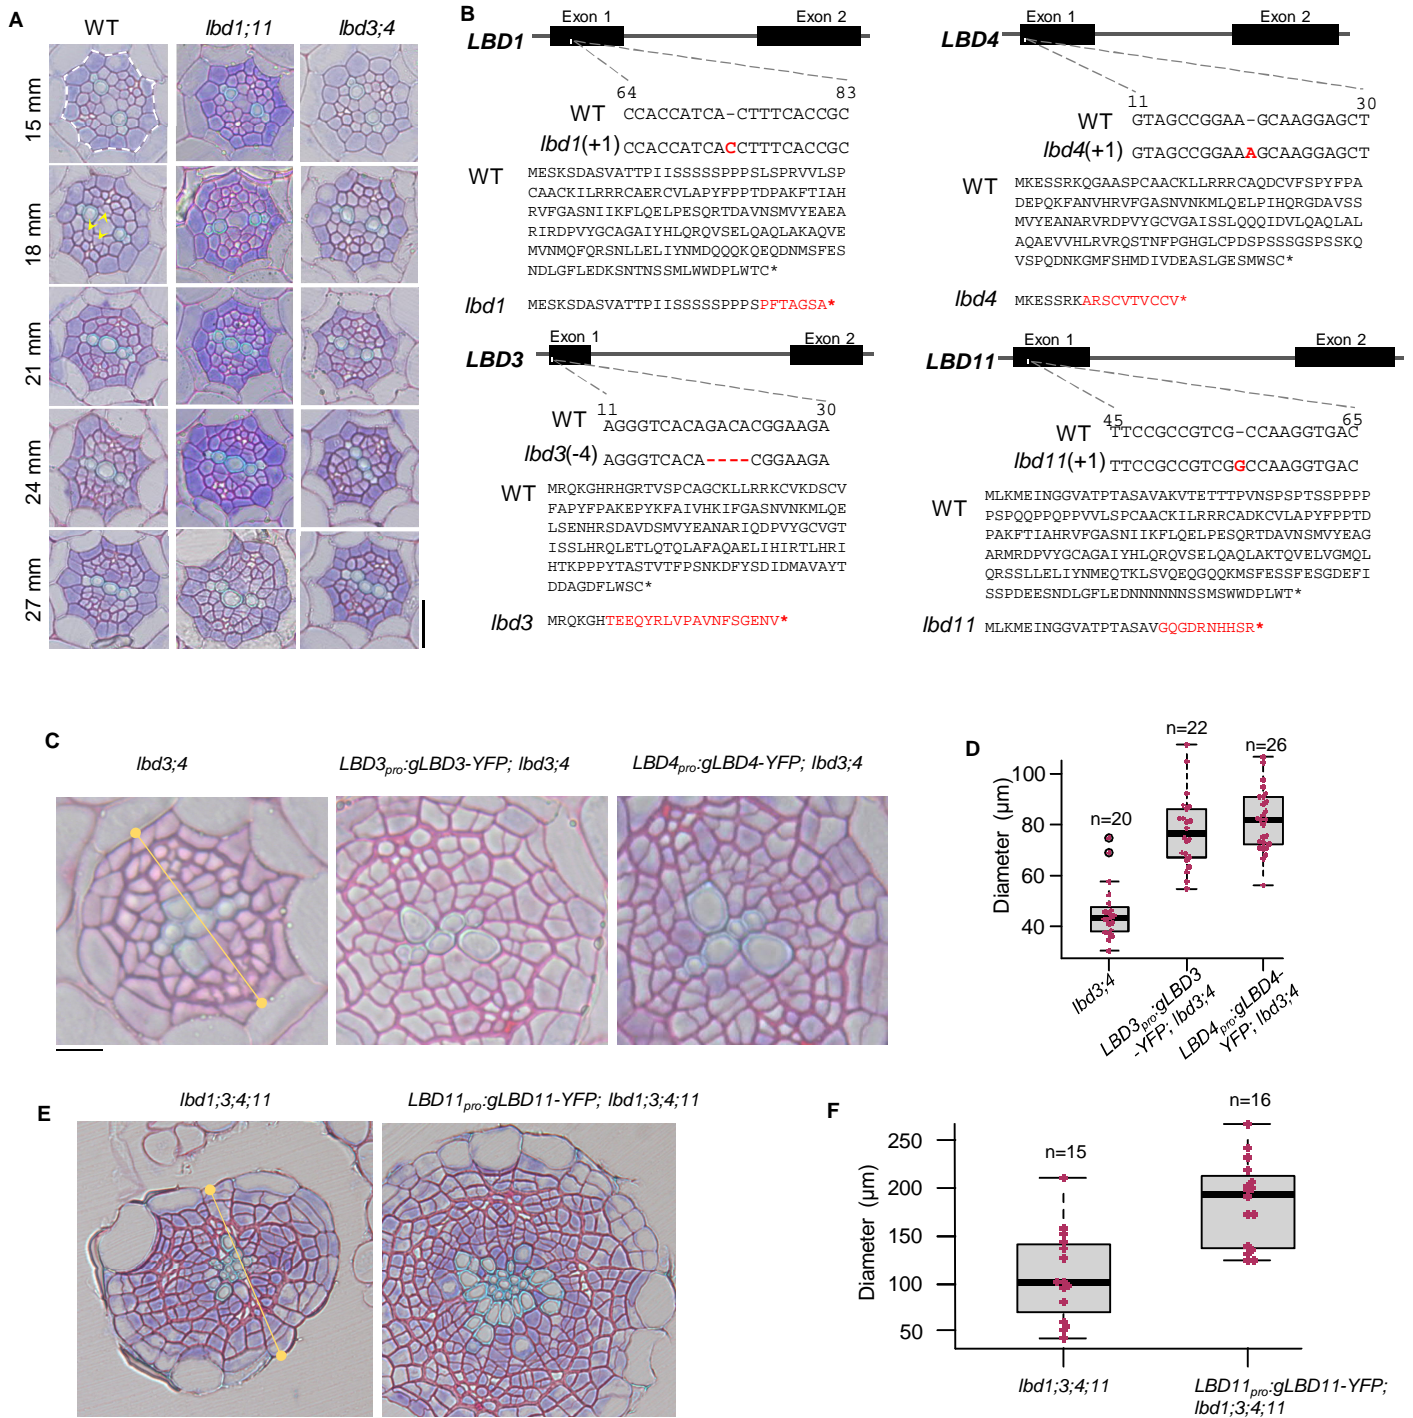

**Figure S2 Characterization of LBD knock-out mutants generated by *CRISPR/Cas9* method. Related to Figure 1 and STAR Methods.**

**(A)** Serial cross-sections of wild-type (WT) and *lbd* mutants along 7-day-old roots. Cells and area inside of dotted line were used in cell file (Figure 1C) and total radial area (Figure 1D) quantification, respectively. X-axis indicate the distance of cross-sections from root tips. Arrowheads indicate cell divisions in xylem-procambial cells. **(B)** A schema of the LBD mutant alleles created with the *CRISPR/Cas9* system. Chromatograms show the sequencing results from both WT and homozygote mutant alleles. Red letters represent frameshift and premature terminations during translation. **(C)** Functional complementation of *lbd* alleles by introducing genomic LBD (*gLBD*) constructs translationally fused with *YFP*. Cross-sections were collected in 9-day-old roots. **(D)** Quantification of diameter (yellow line) in the experiment presented in (C). Red dots indicate diameters in individual roots. n= number of independent roots analyzed. **(E)** Functional complementation of *lbd* alleles by introducing genomic *LBD11* (*gLBD11*) constructs translationally fused with *YFP*. Cross-sections were collected in 14-day-old roots. **(F)** Quantification of diameter (yellow line) in the experiment presented in (E). Red dots indicate diameters in individual roots. n= number of independent roots analyzed. Scale bars, 20  $\mu\text{m}$ .

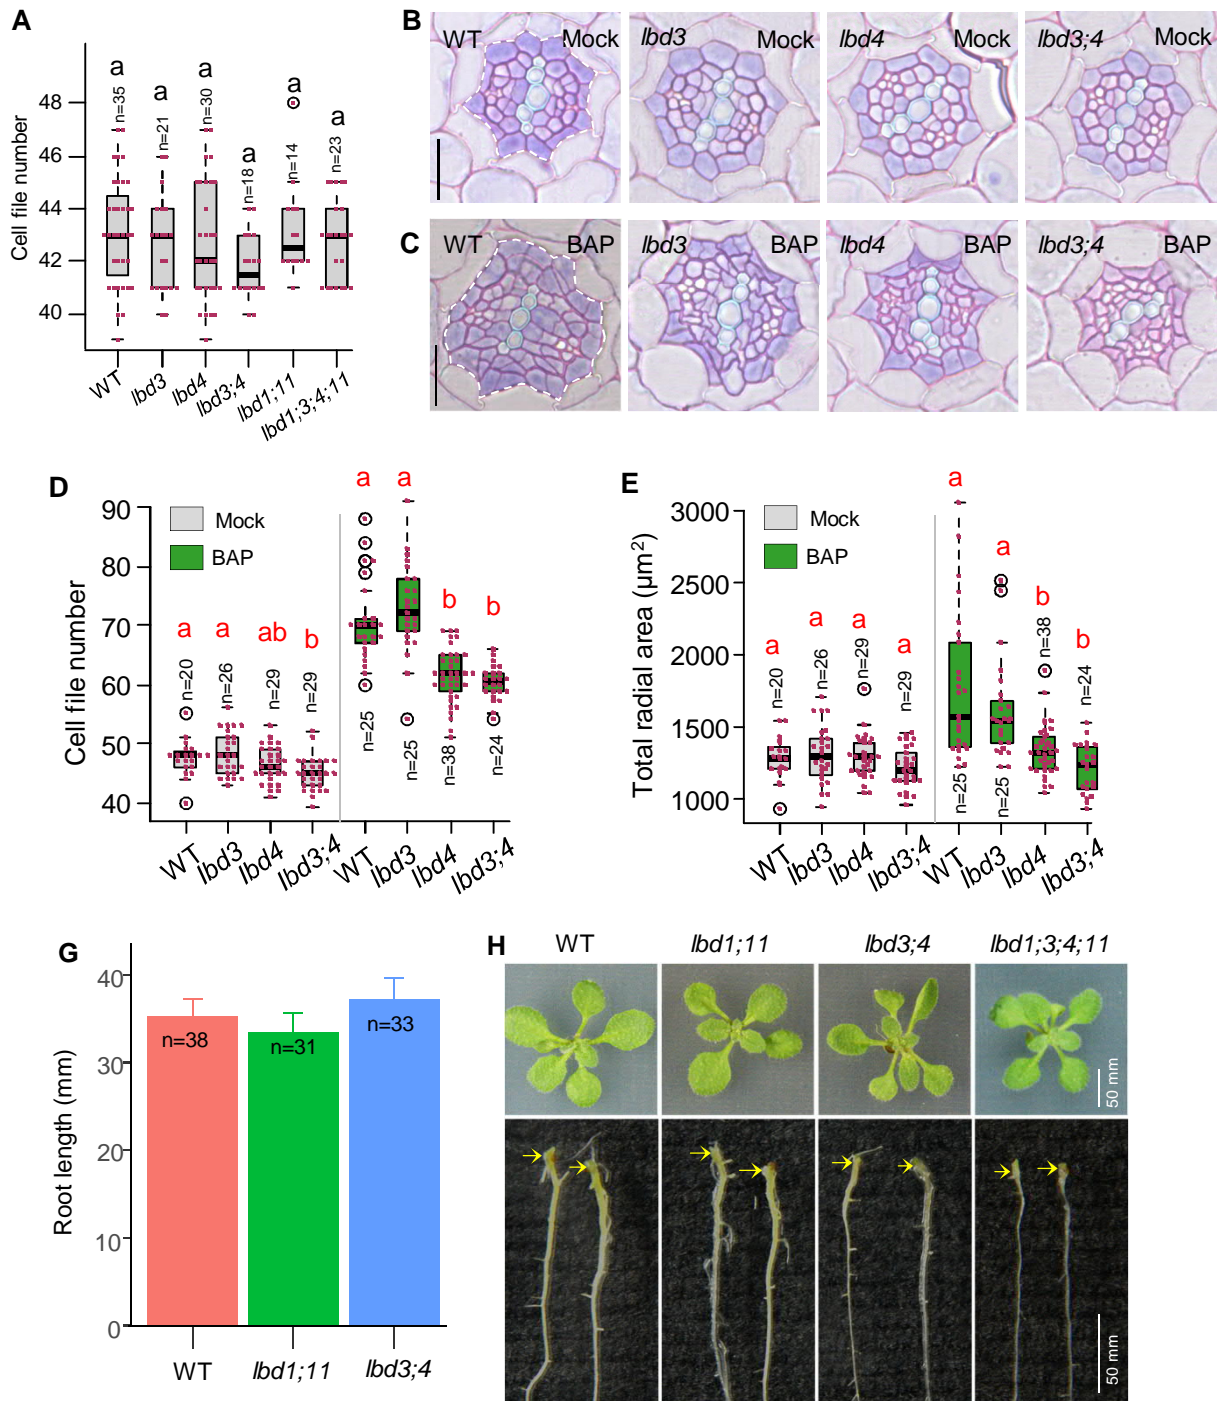

**Figure S3 Phenotypic characterization of *lbd* mutants. Related to Figure 2, 3 and Data S2.**

(A) Quantification of the cell file number in 3-day-old roots. One-way ANOVA with Tamhane's post-test at significance level  $\alpha=0.05$ . All ANOVA results can be found in Data S2J. Red dots indicate cell file number in individual roots. n= number of independent roots analyzed. (B, C) Cross-sections of 5-day-old WT, *lbd3*, *lbd4* and *lbd3;4* roots. Three-day-old roots were treated for 2 days with mock (B) or 1  $\mu$ M BAP (C). Cells inside of dotted line were used in cell file quantification (D). Scale bars, 20  $\mu$ m. (D, E) Quantification of cell file number (D) and total radial area (E) in the experiment presented in (B) and (C). A separate ANOVA test was performed for mock and BAP treatment. Different letters indicate significant difference at level  $\alpha=0.05$ , as determined by one-way ANOVA with Tamhane's post-test or Tukey post-hoc test. All ANOVA results can be found in Data S2K,L. Red dots indicate cell file number in individual roots. n= number of independent roots analyzed. (G) Root length quantifications of 7-day-old WT, *lbd1;11* and *lbd3;4* plants. Bars show mean  $\pm$  SD. n= number of independent roots analyzed. (H) Rosettes and main roots of 14-day-old WT, *lbd1;11*, *lbd3;4* and *lbd1;3;4;11* plants. Arrows indicate the root-hypocotyl junction.

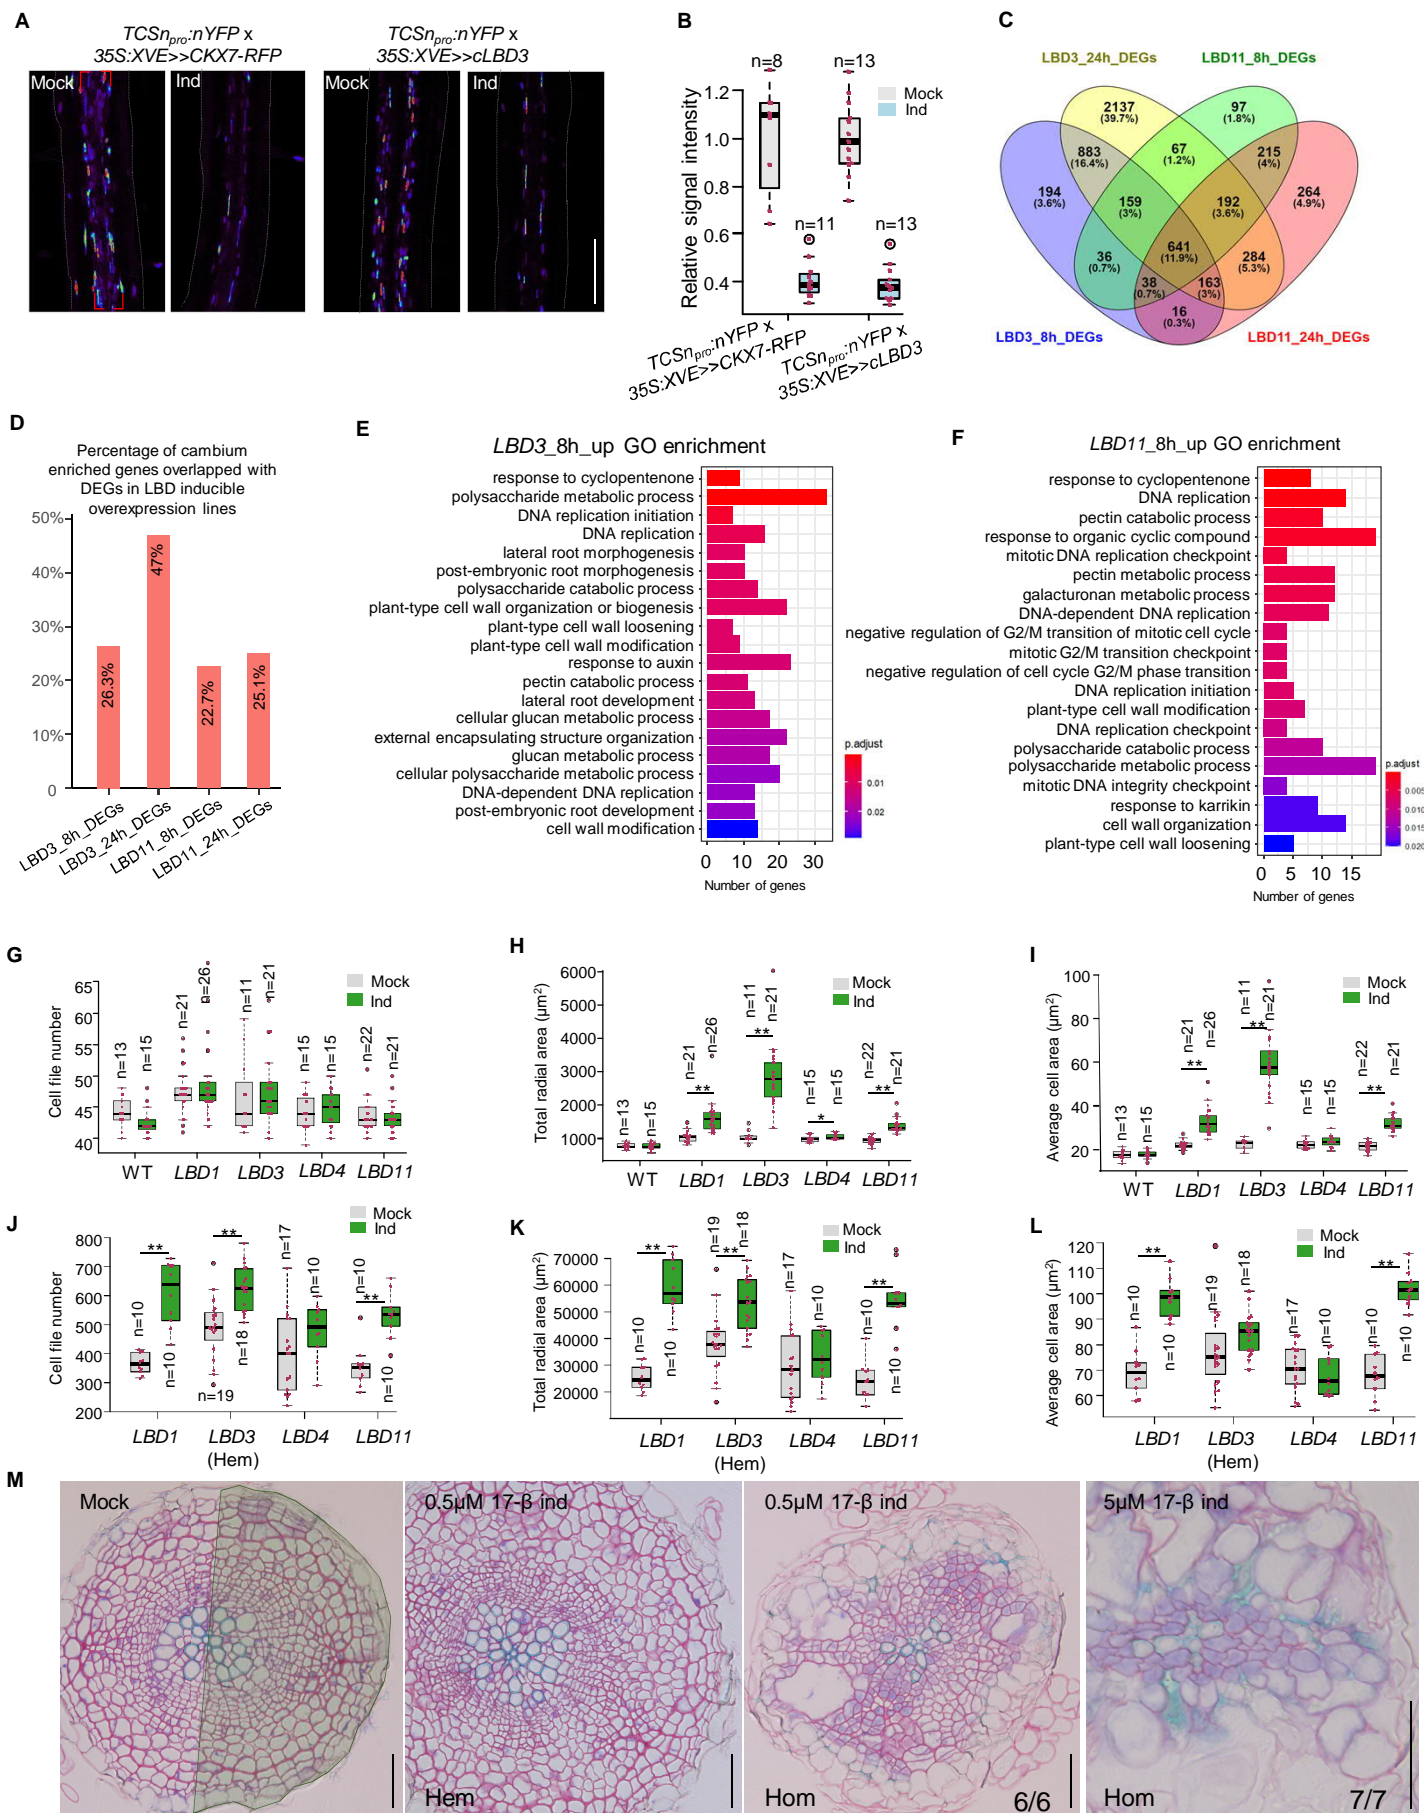

**Figure S4 Analysis of RNA-seq datasets and phenotypic characterization of LBD inducible overexpression lines. Related to Figure 4, Data S1, S3 and STAR Methods.**

(A) Induction of *LBD3* led to downregulation of *TCSn* equally rapidly with induction of CKX7. Confocal microscopy of *TCSn<sub>pro</sub>:nYFP* after 8 h CKX7 induction or *LBD3* induction in 6-day-old plants. Dashed lines represent root boundaries. Expression intensity within the vascular area marked with brackets was quantified and is shown in (B). (B) Quantification of average fluorescent signal intensity in (A). Red dots indicate average fluorescent signal intensity in individual roots. n= number of independent roots analyzed. (C) Venn diagram comparing DEGs in the *LBD3* inducible overexpression line and the *LBD11* inducible overexpression line. DEGs for all samples can be found in Data S1. (D) A bar plot showing the percentage of cambium enriched genes<sup>S4</sup> overlapped with DEGs in *LBD* inducible overexpression lines. The lists of overlapped genes can be found in Data S1. (E, F) Gene ontology (GO) enrichment analysis of differentially upregulated genes in the *LBD3* line (E) and the *LBD11* line (F) with 8 h induction. The top twenty enriched biological process GO terms are presented. The full list of GO terms is listed in Data S3. (G-I) Quantification of cell file number (G), total radial area (H) and average cell area (I) in the experiment presented in Figure 4H. Three-day-old roots were treated for 2 days with mock or 5  $\mu$ M 17- $\beta$ , except in the case of *LBD3* which was treated with 0.5  $\mu$ M 17- $\beta$ . WT was used as control. Red dots indicate individual roots. n= number of independent roots analyzed. (J-L) Quantification of cell file number (J), total radial area (K) and average cell area (L) in the experiment presented in Figure 4I. Eight-day-old roots were treated for 6 days with mock or 5  $\mu$ M 17- $\beta$ , except 0.5  $\mu$ M 17- $\beta$  was used for the *LBD3* hemizygous (Hem) line. Two-tailed t-test. \*,  $p < 0.05$ ; \*\*,  $p < 0.01$ . Red dots indicate individual roots. n= number of independent roots analyzed. (M) *LBD3* functions in a dose-dependent manner. The severity of the *LBD3* overexpression phenotype depends on the copy number of the construct (Hem or Hom) and the concentration of the inducer (17- $\beta$ ). Eight-day-old roots were treated with mock or 17- $\beta$  induction for 6 days. The numbers in the bottom right corner represent the frequency of the observed phenotype. Hem, hemizygous. Hom, Homozygous. Half of the cross section area (marked in green) was used for quantification in (J-L). Scale bars, 100  $\mu$ m (A), 50  $\mu$ m (M).

| Purpose                        | Sequence (5'-3')                       | Note                                                                                        |
|--------------------------------|----------------------------------------|---------------------------------------------------------------------------------------------|
| <b>Cloning primers</b>         |                                        |                                                                                             |
| <i>attB4-pLBD1-3152bp-F</i>    | ATAGAAAAGTTGAACCCGAGAGTCATGGCTGTTT     | <i>LBD1</i> promoter cloning                                                                |
| <i>attB1-pLBD1-R</i>           | TGTACAAACTTGCACCAACGCAAAAACGTGAATTATGG |                                                                                             |
| <i>attB4-pLBD4-4434bp-F</i>    | ATAGAAAAGTTGAA TGCC TTGAGGAACAAAGT GTG | <i>LBD4</i> promoter cloning                                                                |
| <i>attB1-pLBD4-R</i>           | TGTACAAACTTGCCCTCGCCGCCACGTGTC         |                                                                                             |
| <i>attB4-pLBD11-4943bp-F</i>   | ATAGAAAAGTTGAAAAAGGTCCACGCCATTAGA      | <i>LBD11</i> promoter cloning                                                               |
| <i>attB1-pLBD11-R</i>          | TGTACAAACTTGCGATTCTCAAATA TTTTGGGGCTT  |                                                                                             |
| <i>attB4-pTCS-F</i>            | ATAGAAAAGTTGCCGACGCGTAAGCTTGACTAGTC    | <i>TCS</i> promoter cloning                                                                 |
| <i>attB1-pTCS-R</i>            | TGTACAAACTTGCCAACTTGTGATGGGTCTC        |                                                                                             |
| <i>attB1-LBD1-F</i>            | AAAAAGCAGGCTCGATGGAGAGTAAAGTGACGCTTC   | <i>LBD1</i> coding sequence cloning                                                         |
| <i>attB2-LBD1-R</i>            | AGAAAGCTGGGTGTCAACATGTCCAAGAGGATCCC    |                                                                                             |
| <i>attB1-LBD3-F</i>            | AAAAAGCAGGCTCGATGAGACAAAAGGGTCACAGAC   | <i>LBD3</i> genomic sequence cloning                                                        |
| <i>attB2-LBD3-R</i>            | AGAAAGCTGGGTGGCAAGACCAAAGGAAGCTCC      |                                                                                             |
| <i>attB1-LBD4-F</i>            | AAAAAGCAGGCTCGATGAAAGAAAGTAGCCGGAAGC   | <i>LBD4</i> genomic sequence cloning                                                        |
| <i>attB2-LBD4-R</i>            | AGAAAGCTGGGTGGCAAGACCACATAGACTCTCCC    |                                                                                             |
| <i>attB1-LBD11-F</i>           | AAAAAGCAGGCTCGATGCTAAAGATGGAGATTAACGG  | <i>LBD11</i> cloning                                                                        |
| <i>attB2-LBD11-R1</i>          | AGAAAGCTGGGTGTCAATGTCCAAGAGGATCCCACCAG | <i>LBD11</i> coding sequencing cloning                                                      |
| <i>attB2-LBD11-R2</i>          | AGAAAGCTGGGTGTCAATGTCCAAGAGGATCCCACCAG |                                                                                             |
| <i>attB1-CKX7-F</i>            | AAAAAGCAGGCTAAATGATAGCTTACATAGAACC     | <i>CKX7</i> genomic sequence cloning                                                        |
| <i>attB2-CKX7-R</i>            | AGAAAGCTGGGTAAAGAGACCTATTGAAAATCT      |                                                                                             |
| <i>adapter-attB1-F</i>         | GGGGACAAGTTTGTACAAAAAGCAGGCT           | full length BP adaptors                                                                     |
| <i>adapter-attB2--R</i>        | GGGGACCACTTTGTACAAAGAAAGCTGGGT         |                                                                                             |
| <i>adapter-attB4-F</i>         | GGGGACAACCTTGTATAGAAAAGTTG             |                                                                                             |
| <i>adapter-attB1-R</i>         | GGGGACTGCTTTTTGTACAAACTTG              |                                                                                             |
| <b>CRISPR-Cas9 primers</b>     |                                        |                                                                                             |
| <i>attB4-pEC1.2en EC1.1p-F</i> | ATAGAAAAGTTGAAGAATAAAAGCATTTCGCTTTGGTT | Egg cell specific promoter cloning                                                          |
| <i>attB1-pEC1.2en EC1.1p-R</i> | TGTACAAACTTGCCTTCTCAACAGATTGATAAGGTCGA |                                                                                             |
| <i>attB1-zCAS9-rbcS-F</i>      | AAAAAGCAGGCTCGATGGATTACAAGGACCACGACG   | Cas9 cloning                                                                                |
| <i>attB2-zCAS9-rbcS-R</i>      | AGAAAGCTGGGTGGTTGTCAATCAATTGGCAAGTCATA |                                                                                             |
| <i>LBD1-gRT#+</i>              | ACTACCCGCGGTGAAAGTGAGTTTTAGAGCTAGAAAT  | guide RNA cloning                                                                           |
| <i>LBD3-gRT#+</i>              | AGACAAAAGGGTCACAGACAGTTTTAGAGCTAGAAAT  |                                                                                             |
| <i>LBD4-gRT#+</i>              | GTGACGCAGCTCTTGCTTCGTTTTAGAGCTAGAAAT   |                                                                                             |
| <i>LBD11-gRT#+</i>             | GGTTTCTGTACCTTGCCGAGTTTTAGAGCTAGAAAT   |                                                                                             |
| <i>LBD1-AtU3bT#-</i>           | TCACTTTCACCCGGGTAGTTGACCAATGTTGCTCC    |                                                                                             |
| <i>LBD3-AtU3dT#-</i>           | TGTCTGTGACCCTTTTGTCTTGACCAATGGTGTCTTG  |                                                                                             |
| <i>LBD4-AtU6-1T#-</i>          | GAAGCAAGGAGCTGCGTCACCAATCACTACTTCGTCT  |                                                                                             |
| <i>LBD11-AtU6-29T#-</i>        | TCGCCAAGGTGACAGAAACCAATCTCTTAGTCGACT   |                                                                                             |
| <i>LBD4-AtU3bT#-</i>           | GAAGCAAGGAGCTGCGTCACCAATGTTGCTCC       |                                                                                             |
| <b>Genotyping primers</b>      |                                        |                                                                                             |
| 1) dCAPs primers               |                                        |                                                                                             |
| <i>lbd1-c1-dcaps-F</i>         | CATATCTTCTCTCTCTCTCTCCACCAGTAC         | After <i>ScaI</i> digestion: mut :179 bp; WT: 147bp and 33bp                                |
| <i>lbd1-dcaps-R</i>            | GTTGCTGGCTCCAAAGACGC                   |                                                                                             |
| <i>lbd3-c1-dcaps-F</i>         | CTCTCTTCTTAAATGAGACAAAAGGGTCTCA        | After <i>DdeI</i> digestion: mut :197 bp; WT: 170bp and 31bp                                |
| <i>lbd3-c1-dcaps-R</i>         | CCTGCAACATCTTATTGACATTACTAGCACC        |                                                                                             |
| <i>lbd11-c1-dcaps-F</i>        | CGTACACCTACTGCTTCCGCGGCCG              | After <i>NotI</i> digestion: mut :136 bp; WT: 115bp and 21bp                                |
| <i>lbd11-c1-dcaps-R</i>        | GGGCTTAGTACAACCGGTGGTTGTGGC            |                                                                                             |
| 2) sequencing primers          |                                        |                                                                                             |
| <i>LBD3-CRISPR-F</i>           | CTCTCTTGT TTTGCTCTCAATTC               | amplify <i>LBD3</i> for sequencing                                                          |
| <i>LBD3-CRISPR-R</i>           | CGGTGGTTCTCCGACAGCTC                   |                                                                                             |
| <i>LBD3-CRISPR-R-seq</i>       | CTGCAACATCTTATTGACATT                  | <i>LBD3</i> sequencing primer                                                               |
| <i>LBD1-CRISPR-R-seq</i>       | CTGCAAGAACTAATGATGTT                   | <i>LBD1</i> sequencing primer, <i>attB1-LBD1-F/attB2-LBD1-R</i> used to amplify <i>LBD1</i> |
| <i>LBD4-CRISPR-F</i>           | GACAATCCAACGGTTGAGATT                  | amplify <i>LBD4</i> together with <i>attB2-LBD4-R</i>                                       |
| <i>LBD4-CRISPR-R-seq</i>       | CTGAAGCATCTTGTGACGTT                   |                                                                                             |

| <i>LBD11-CRISPR-R</i>     | GTTCTTTGCGATTCTGGAAGTTC                              | amplify <i>LBD11</i> together with <i>attB1-LBD11-F</i> |
|---------------------------|------------------------------------------------------|---------------------------------------------------------|
| <i>LBD11-CRISPR-R-seq</i> | CCAAAGACACGGTGAGCGATT                                | <i>LBD11</i> sequencing primer                          |
| qPCR primers              |                                                      | References                                              |
| <i>TIP41</i>              | GTGAAAAC TGTGGAGAGAAGCAA<br>TCAACTGGATACCCTTTTCGCA   | S7                                                      |
| <i>ACT2</i>               | ACATTGTGCTCAGTGGTGGA<br>CTGAGGGAAGCAAGAATGGA         | S8                                                      |
| <i>UBQ10</i>              | CGTCTTCGTGGTGGTTTCTAAA<br>ACAAGGCCCCAAAACACAAA       | S8                                                      |
| <i>TDR</i>                | TCAAACCGACGAATCCATGTC<br>CACGACCTACCCATGCTTTTG       | S9                                                      |
| <i>WOX4</i>               | GACAAGAACATCATCGTCACTAGACA<br>TTCTCCACCATTGGTTCTCTCA | S10                                                     |
| <i>LBD1</i>               | ACGCTTCTGTCCGACCACCT<br>TCTCTGCACAACGTCGCCTCA        | this study                                              |
| <i>LBD3</i>               | ATGTTGCAGGAGCTGTCGG<br>CATCGAATCCACGGCGTC            | S4                                                      |
| <i>LBD4</i>               | CGTCAACAAGATGCTTCAGG<br>CCTCGTAAACCATGCTGCTC         | S4                                                      |
| <i>LBD11</i>              | CCTACTGCTTCCGCCGTCGC<br>GCAAGCCGCACAAGGGCTTA         | this study                                              |
| <i>ARR15</i>              | TGGGACTAGGGCTCTGCAGT<br>GAAGATCCATTGTCTCCATCTAAACC   | this study                                              |
| <i>ARR5</i>               | TCAGAGAACATCTGCCTCGT<br>ATTTACAGGCTTCAATAAGAAATC     | S11                                                     |

**Table S1 Primers used in this study. Related to STAR Methods.**



| Hormone             |                     | Abscisic acid                           |                                         | Auxin                                                                                       |                                                                                                                                                                                                                                                      | Cytokinin                                                                                                                                            |                                                                             |
|---------------------|---------------------|-----------------------------------------|-----------------------------------------|---------------------------------------------------------------------------------------------|------------------------------------------------------------------------------------------------------------------------------------------------------------------------------------------------------------------------------------------------------|------------------------------------------------------------------------------------------------------------------------------------------------------|-----------------------------------------------------------------------------|
|                     |                     | Hormone metabolism; proportion of genes | Signaling transduction                  | Hormone metabolism; proportion of genes                                                     | Signaling transduction                                                                                                                                                                                                                               | Hormone metabolism; proportion of genes                                                                                                              | Signaling transduction                                                      |
| LBD3_8h Induction   | Up-regulated DEGs   | NCED9, ABA1; 2/15 (13.3%)               | HAI3; 1/44 (2.3%)                       | TAA1; 1/32 (3.1%)                                                                           | SAUR54, GH3.17, LAX3, GH3.1, SAUR8, SAUR38, SAUR45, AUX1, IAA14, IAA1, IAA11, IAA29, SAUR50, SAUR9, SAUR30; 15/120 (12.5%)                                                                                                                           | AtCKX1; 1/39 (2.6%)                                                                                                                                  |                                                                             |
|                     | Down-regulated DEGs | -                                       | HAI2, ABI5, PYL7, SNRK2.7; 4/44 (9.1%)  | AAO1, CYP79B2, CYP79B3, SUR2, SUR1, TAR3, YUCCA6, YUCCA8; 8/32 (25%)                        | AT1G48670, AXR3, BRU6, GH3.3, GH3.9, IAA16, IAA28, IAA30, IAA5, SAUR33, SAUR4, SAUR40, SAUR51, SAUR55, SAUR6, SHY2; 16/120 (13.3%)                                                                                                                   | APT2, APT3, APT4, AtCKX2, AtCKX3, AtCKX4, AtCKX6, AtIPT3, AtLOG3, AtLOG6, CYP735A1, CYP735A2, UGT76C2; 13/39 (33.3%)                                 | ARR15, ARR4, ARR5, ARR6, ARR7, ARR9, WOL; 7/33 (21.2%)                      |
| LBD3_24h Induction  | Up-regulated DEGs   | NCED5, NCED9, ABA1; 3/15 (20%)          | PYL2, HAI3, EEL; 3/44 (6.8%)            | TAA1; 1/32 (3.1%)                                                                           | SAUR54, GH3.17, SAUR71, SAUR52, LAX3, GH3.1, SAUR8, SAUR38, SAUR45, AUX1, TIR1, IAA14, IAA1, IAA29, SAUR50, SAUR9, SAUR30; 17/120 (14.2%)                                                                                                            | AtCKX1; 1/39 (2.6%)                                                                                                                                  | ARR10; 1/33 (3%)                                                            |
|                     | Down-regulated DEGs | BG1, NCED3, NCED2; 3/15 (20%)           | HAI2, PYL7, SNRK2.7; 3/44 (6.8%)        | AAO1, CYP79B2, CYP79B3, CYP83B1, NIT1, SUR1, TAR3, TSA1, TSB, YUCCA2, YUCCA6; 11/32 (34.4%) | AT1G48670, AXR3, BRU6, GH3.3, GH3.9, IAA13, IAA16, IAA18, IAA28, IAA30, IAA31, IAA32, IAA5, IAA7, IAA9, PAP2, PBS3, SAUR14, SAUR29, SAUR31, SAUR32, SAUR33, SAUR34, SAUR36, SAUR40, SAUR51, SAUR53, SAUR55, SAUR6, SAUR4, SHY2, WES1; 32/120 (26.7%) | APT2, APT3, APT4, AtCKX2, AtCKX3, AtCKX4, AtCKX5, AtCKX6, AtIPT3, AtIPT5, AtLOG1, AtLOG3, AtLOG5, AtLOG6, CYP735A1, CYP735A2, UGT76C2; 14/39 (35.9%) | ARR11, ARR15, ARR16, ARR3, ARR4, ARR5, ARR6, ARR7, ARR9, WOL; 10/33 (30.3%) |
| LBD11_8h Induction  | Up-regulated DEGs   | NCED9; 1/15 (6.7%)                      | RCAR1; 1/44 (2.3%)                      | NIT4; 1/32 (3.1%)                                                                           | IAA10, SAUR71, SAUR8, SAUR45, SAUR34, IAA29; 6/120 (5%)                                                                                                                                                                                              | AtLOG5; 1/39 (2.6%)                                                                                                                                  | AHP4; 1/33 (3%)                                                             |
|                     | Down-regulated DEGs | -                                       | PYL7, PYL12; 2/44 (4.5%)                | AMI1, CYP79B3, NIT1; 3/32 (9.4%)                                                            | AT1G48660, AXR3, DFL1, GH3.9, IAA28, LAX1, PAP2, SAUR29, SAUR51, SAUR6; 10/120 (8.3%)                                                                                                                                                                | APT2, APT3, APT4, AtCKX2, AtCKX4, AtCKX6, AtIPT3, AtLOG3, AtLOG6, CYP735A1; 10/39 (25.6%)                                                            | ARR15, ARR4, ARR5, ARR6, ARR7, WOL; 6/33 (18.2%)                            |
| LBD11_24h Induction | Up-regulated DEGs   | NCED9; 1/15 (6.7%)                      | -                                       | NIT4; 1/32 (3.1%)                                                                           | GH3.3, IAA10, IAA29, SAUR30, SAUR45, SAUR5, SAUR71, SAUR8; 8/120 (6.7%)                                                                                                                                                                              | AtCKX1, AtLOG5; 2/39 (5.1%)                                                                                                                          | AHP4, ARR18; 2/33 (6%)                                                      |
|                     | Down-regulated DEGs | -                                       | HAI2, ABI5, SNRK2.7, PYL12; 4/44 (9.1%) | AMI1, YUCCA6; 2/32 (6.3%)                                                                   | AT1G48660, AT1G48670, AXR3, DFL1, GH3.9, IAA28, IAA5, LAX1, PAP2, SAUR14, SAUR32, SAUR33, SAUR51, SAUR59, SAUR6; 15/120 (12.5%)                                                                                                                      | APT2, APT3, APT4, AtCKX3, AtCKX4, AtCKX5, AtCKX6, AtLOG3, AtLOG6, CYP735A1, CYP735A2, UGT73C5; 12/39 (30.8%)                                         | ARR15, ARR4, ARR5, ARR6, ARR7, ARR9, WOL; 7/33 (21.2%)                      |

| Hormone             |                     | Brassinosteroid                         |                                | Ethylene                                |                        | Gibberellin                                                                          |                                             | Jasmonic acid                           |                                                             | Salicylic acid                                  |                                    |
|---------------------|---------------------|-----------------------------------------|--------------------------------|-----------------------------------------|------------------------|--------------------------------------------------------------------------------------|---------------------------------------------|-----------------------------------------|-------------------------------------------------------------|-------------------------------------------------|------------------------------------|
|                     |                     | Hormone metabolism; proportion of genes | Signaling transduction         | Hormone metabolism; proportion of genes | Signaling transduction | Hormone metabolism; proportion of genes                                              | Signaling transduction                      | Hormone metabolism; proportion of genes | Signaling transduction                                      | Hormone metabolism; proportion of genes         | Signaling transduction             |
| LBD3_8h Induction   | Up-regulated DEGs   | BAS1, BR6ox1; 2/13 (15.4%)              | -                              | -                                       | -                      | AtGA2ox6; 1/24 (4.2%)                                                                | RGL2; 1/12 (8.3%)                           | -                                       | -                                                           | -                                               | CAP, PR-1-LIKE; 2/24 (8.3%)        |
|                     | Down-regulated DEGs | CYP90D1, BR6ox2, DWF4; 3/13 (23.1%)     | -                              | -                                       | -                      | AtGA3ox1, AtGA2ox7; 2/24 (8.3%)                                                      | -                                           | AOC2; 1/17 (5.9%)                       | JAZ4, JAZ6; 2/13 (15.4%)                                    | ICS2, ICS1, AtMES1, AtMES9; 4/9 (44.4%)         | TGA4, TGA1; 2/24 (8.4%)            |
| LBD3_24h Induction  | Up-regulated DEGs   | BAS1, BR6ox1; 3/13 (23.1%)              | BEH2, BRI1, BKI1; 3/22 (13.6%) | -                                       | -                      | AtGA2ox6; 1/24 (4.2%)                                                                | RGL2; 1/12 (8.3%)                           | -                                       | -                                                           | -                                               | CAP, PR-1-LIKE, BOP1; 3/24 (12.5%) |
|                     | Down-regulated DEGs | CYP90D1, BR6ox2, DWF4; 3/13 (23.2%)     | BES1, BEH1; 2/22 (9.1%)        | ACO2; 1/12 (8%)                         | ERF1; 1/21 (4.8%)      | AtGA2ox1, AtGA2ox4, AtGA2ox7, AtGA2ox8, AtGA3ox1/GA4, AtGA3ox2, AtKAO2; 7/24 (29.2%) | GID1C, PIF3, PIF4, PIL6, RGL1; 5/12 (41.7%) | AOC2, AOS, AtST2a, OPR3; 4/17 (23.5%)   | JAZ10, JAZ3, JAZ4, JAZ6, MYC2, TIFY10B, TIFY7; 7/13 (53.8%) | AtMES1, AtMES2, AtMES9, ICS1, ICS2; 5/9 (55.6%) | CAP, TGA1, TGA4; 3/24 (12.5%)      |
| LBD11_8h Induction  | Up-regulated DEGs   | BAS1, BR6ox1; 2/13 (15.4%)              | -                              | -                                       | -                      | -                                                                                    | -                                           | -                                       | -                                                           | -                                               | -                                  |
|                     | Down-regulated DEGs | CYP90D1, BR6ox2; 2/13 (15.5%)           | -                              | -                                       | -                      | AtGA2ox7, AtGA2ox2; 2/24 (8.3%)                                                      | -                                           | -                                       | TIFY7; 1/13 (7.7%)                                          | AtMES9, ICS1, ICS2; 3/9 (33.3%)                 | CAP; 1/24 (4.2%)                   |
| LBD11_24h Induction | Up-regulated DEGs   | BAS1, BR6ox1; 2/13 (15.6%)              | -                              | ACS2; 1/12 (8%)                         | -                      | -                                                                                    | -                                           | -                                       | -                                                           | -                                               | -                                  |
|                     | Down-regulated DEGs | UGT73C5; 1/13 (7.7%)                    | -                              | -                                       | -                      | AtGA2ox2; 1/24 (4.2%)                                                                | -                                           | -                                       | JAZ4; 1/13 (7.7%)                                           | ICS1, ICS2; 2/9 (22.2%)                         | PAN, CAP, TGA4; 3/24 (12.5%)       |

**Table S2 Hormone-related genes differentially expressed in *LBD3* or *LBD11* inducible overexpression RNA-seq data. Related to Figure 4 and STAR Methods.**

## SUPPLEMENTAL REFERENCES

- S1. Zubo, Y.O., Blakley, I.C., Yamburenko, M.V., Worthen, J.M., Street, I.H., Franco-Zorrilla, J.M., Zhang, W., Hill, K., Raines, T., Solano, R., et al. (2017). Cytokinin induces genome-wide binding of the type-B response regulator ARR10 to regulate growth and development in Arabidopsis. *Proc. Natl. Acad. Sci. USA* 114, E5995-E6004.
- S2. Xie, M., Chen, H., Huang, L., O'Neil, R.C., Shokhirev, M.N., and Ecker, J.R. (2018). A B-ARR-mediated cytokinin transcriptional network directs hormone cross-regulation and shoot development. *Nat. Commun.* 9, 1604.
- S3. Bhargava, A., Clabaugh, I., To, J.P., Maxwell, B.B., Chiang, Y.H., Schaller, G.E., Loraine, A., and Kieber, J.J. (2013). Identification of cytokinin-responsive genes using microarray meta-analysis and RNA-Seq in Arabidopsis. *Plant Physiol.* 162, 272-294.
- S4. Zhang, J., Eswaran, G., Alonso-Serra, J., Kucukoglu, M., Xiang, J., Yang, W., Eib, A., Nieminen, K., Damen, T., Joung, J.G., et al. (2019). Transcriptional regulatory framework for vascular cambium development in Arabidopsis roots. *Nat. Plants* 5, 1033-1042.
- S5. Larkin, M.A., Blackshields, G., Brown, N.P., Chenna, R., McGettigan, P.A., McWilliam, H., Valentin, F., Wallace, I.M., Wilm, A., Lopez, R., et al. (2007). Clustal W and Clustal X version 2.0. *Bioinformatics* 23, 2947-2948.

- S6. Kumar, S., Stecher, G., and Tamura, K. (2016). MEGA7: Molecular Evolutionary Genetics Analysis Version 7.0 for Bigger Datasets. *Mol. Biol. Evol.* 33, 1870-1874.
- S7. Czechowski, T., Stitt, M., Altmann, T., Udvardi, M.K., and Scheible, W.R. (2005). Genome-wide identification and testing of superior reference genes for transcript normalization in *Arabidopsis*. *Plant Physiol.* 139, 5-17.
- S8. Randall, R.S., Miyashima, S., Blomster, T., Zhang, J., Elo, A., Karlberg, A., Immanen, J., Nieminen, K., Lee, J.Y., Kakimoto, T., et al. (2015). AINTEGUMENTA and the D-type cyclin CYCD3;1 regulate root secondary growth and respond to cytokinins. *Biol. Open* 4, 1229-1236.
- S9. Wang, J., Kucukoglu, M., Zhang, L., Chen, P., Decker, D., Nilsson, O., Jones, B., Sandberg, G., and Zheng, B. (2013). The *Arabidopsis* LRR-RLK, PXC1, is a regulator of secondary wall formation correlated with the TDIF-PXY/TDR-WOX4 signaling pathway. *BMC Plant Biol.* 13, 94.
- S10. Smetana, O., Makila, R., Lyu, M., Amiryousefi, A., Sanchez Rodriguez, F., Wu, M.F., Sole-Gil, A., Leal Gavarron, M., Siligato, R., Miyashima, S., et al. (2019). High levels of auxin signalling define the stem-cell organizer of the vascular cambium. *Nature* 565, 485-489.
- S11. Gordon, S.P., Chickarmane, V.S., Ohno, C., and Meyerowitz, E.M. (2009). Multiple feedback loops through cytokinin signaling control stem cell number within the *Arabidopsis* shoot meristem. *Proc. Natl. Acad. Sci. USA* 106, 16529-16534.
